# Supplementary material for: E. coli catheter-associated urinary tract infections are associated with distinctive virulence and biofilm gene determinants
Source: PubMed Central journal article supplement (PMC9977300; doi:10.1172/jci.insight.161461), 2023-01-24
Supplement: jciinsight-8-161461-s079.pdf [file jciinsight-8-161461-s079.pdf]

***Escherichia coli* catheter-associated urinary tract infections are associated with distinctive virulence and biofilm gene determinants**

Supplementary information

1 **Supplementary figures**

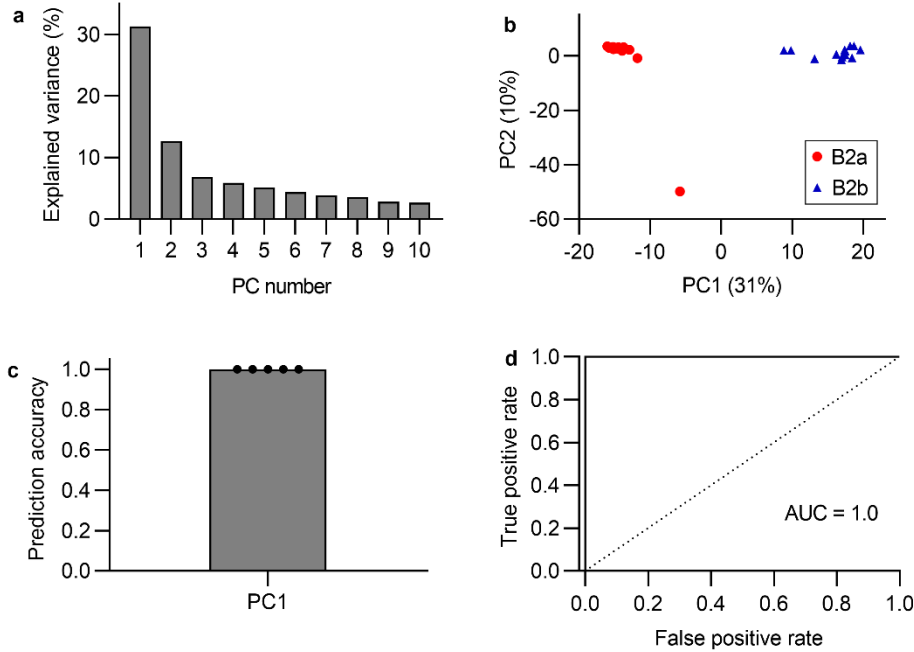

2

3 **Supplementary Figure S1. Identification of two genetically different B2 subclades. (a)**

4 Explained variance of the first ten principal components in sparse principal component analysis

5 (sPCA) of phylotype B2 strains gene composition. **(b)** Score plot of the first two principal

6 components for displaying the group-wise clusterings between two B2 subclades, B2a and B2b.

7 **(c)** Logistic regression using sPCA-derived PC1 values for classifying B2a and B2b yielded a

8 prediction accuracy of 1.0 (SD = 0) with 5-fold cross validations. **(d)** Logistic regression using

9 sPCA-derived PC1 values for classifying B2a and B2b yielded an AUC of 1.0 (SD = 0) with 5-

10 fold cross validations.

11

12

13

14

15

16

17

18

19

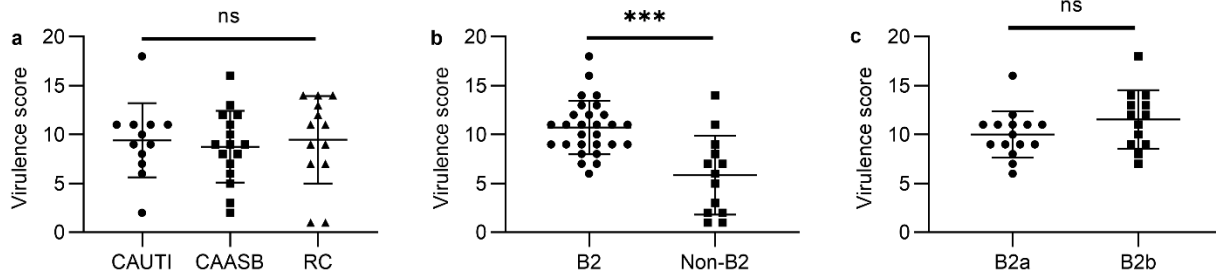

20  
21  
22  
23  
24  
25  
26  
27  
28  
29  
30  
31  
32  
33  
34  
35  
36  
37  
38  
39  
40

**Supplementary Figure S2. Virulence scores in different phenotypic and genetic groups of**

***E. coli* strains. (a)** Comparison of virulence scores between phenotypic groups, CAUTI vs CAASB vs RC. Mean with SD plotted for 12 CAUTI, 16 CAASB, and 13 RC strains, respectively.  $P = 0.147$ , by one-way ANOVA multiple comparisons test. **(b)** Comparison of virulence scores between phylotypic groups, B2 vs Non-B2. Mean with SD plotted for 28 B2 and 13 non-B2 strains, respectively.  $P = 0.002$ , by Mann-Whitney test. **(c)** Comparison of virulence score between subclades within phylotype B2 isolates, B2a vs B2b. Mean with SD plotted for 15 B2a and 13 B2b strains, respectively.  $P = 0.138$ , by Mann-Whitney test.  $P \leq 0.05$  is considered statistically significant. ns: not significant. \*\*\*:  $P < 0.001$ .

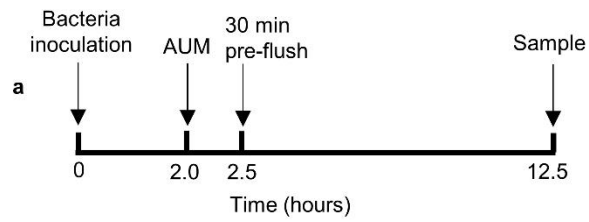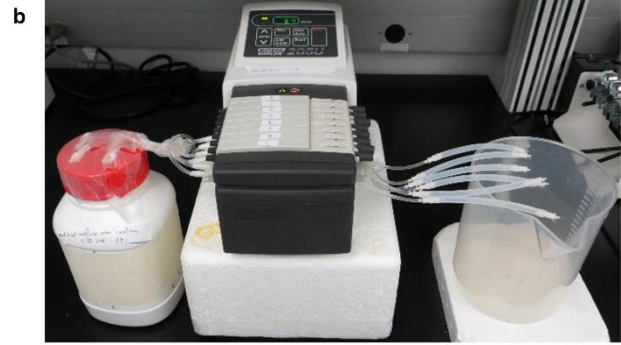

41  
42  
43  
44  
45  
46  
47  
48  
49  
50  
51  
52  
53  
54  
55  
56  
57  
58  
59  
60  
61

**Supplementary Figure S3. Characterization of catheter-biofilm formation in a continuous flow model. (a)** Experimental timeline of the biofilm formation test. **(b)** Schematic diagram of continuous flow catheter system, including influent, peristaltic pump, urinary catheter, and effluent. AUM: artificial urine medium (AUM).

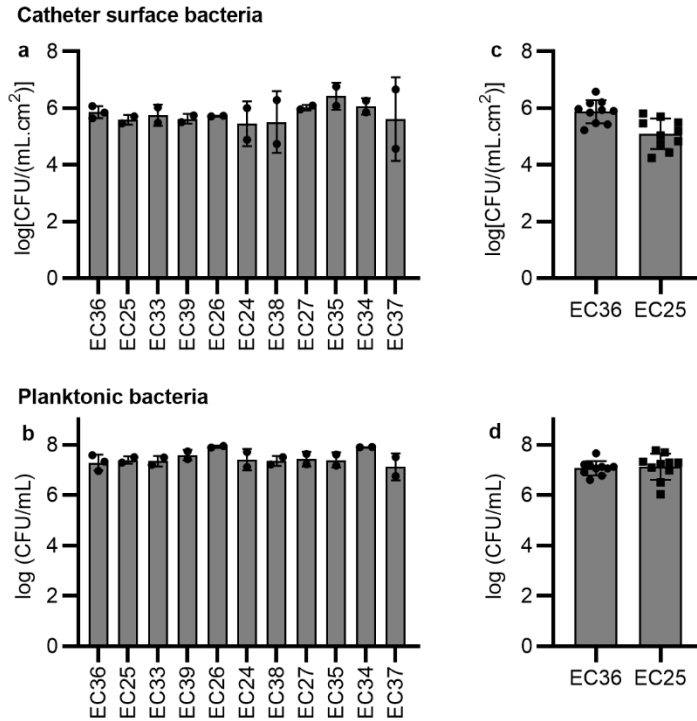

62

63 **Supplementary Figure S4. Planktonic and biofilm bacteria growths in bacterial**

64 **competition tests in catheter colonization model. (a & b) CFUs of ST131 CAUTI strain**

65 **EC20 plus each of 11 non-ST131 CAASB strains (EC36, 25, 33, 39, 26, 24, 38, 27, 35, 34, and**

66 **37) in (a) catheter-adherent bacteria and (b) planktonic bacteria in pair-wise bacterial**

67 **competition tests in the catheter colonization model. Three replicates with mean and SD plotted**

68 **for EC36 and EC25, two replicates with mean and SD plotted for EC33, 39, 26, 24, 38, 27, 35,**

69 **34, and 37. (c & d) CFUs of each of 10 ST131 CAUTI strains (EC12, 13, 14, 15, 16, 17, 18, 19,**

70 **20, and 22) plus either of two non-ST131 CAASB strains (EC36 and EC25) in (c) catheter-**

71 **adherent bacteria and (d) planktonic bacteria in pair-wise bacterial competition tests in the**

72 **catheter colonization model. Ten ST131 CAUTI strains with mean and SD plotted.**

73

74

75

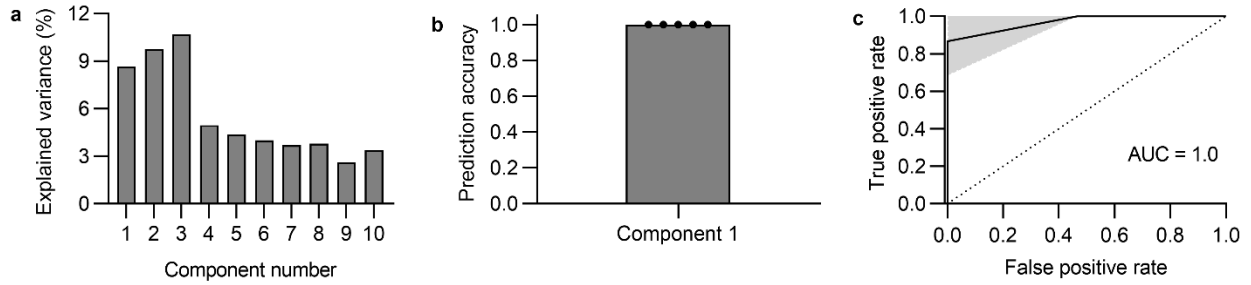

76

77 **Supplementary Figure S5. Identification of catheter biofilm-associated genes. (a)**

78 Explained variance of the first ten principal components in sparse partial least squares

79 discriminant analysis (sPLSDA) of gene composition of high and low biofilm *E. coli* strains. **(b)**

80 Logistic regression using sPLSDA-derived PC1 values for classifying high and low biofilm

81 strains yielded a prediction accuracy of 1.0 (SD = 0) with 5-fold cross validations. **(c)** Logistic

82 regression using sPLSDA-derived PC1 values for classifying high and low biofilm strains yielded

83 an AUC of 1.0 (SD = 0) with 5-fold cross validations.

84

85

86

87

88

89

90

91

92

93

94

95

96

97

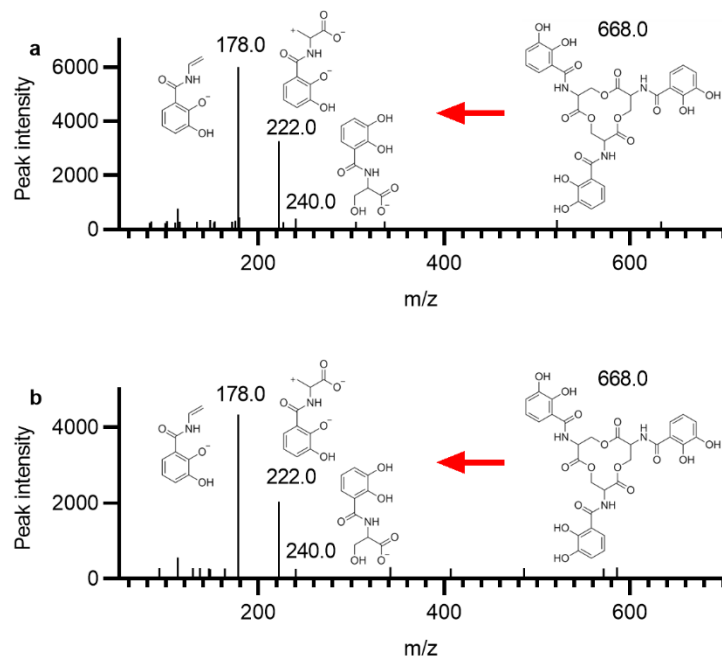

98

99 **Supplementary Figure S6. Cyclic enterobactin is produced by both  $52\Delta fecA$  and**

100  **$52\Delta fecA::fecA$  during catheter-biofilm formation under continuous flow. (a) Tandem**

101 **MS/MS product ion scan spectrum of cyclic enterobactin ( $m/z=668.1$ ) in the voided media of**

102 **EC52 $\Delta fecA$  continuous flow catheter-biofilm assay. (b) Tandem MS/MS product ion scan**

103 **spectrum of cyclic enterobactin ( $m/z=668.1$ ) in the voided media of EC52 $\Delta fecA::fecA$**

104 **continuous flow catheter-biofilm assay.**

105

106

107

108

109

110

111

112

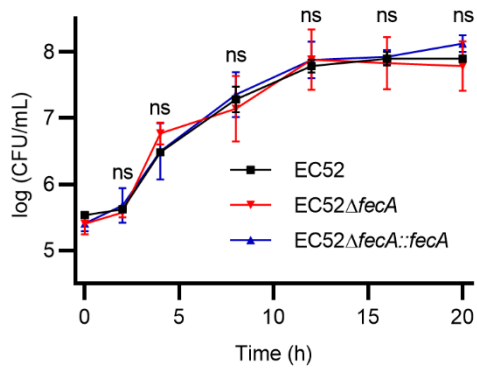

113

114 **Supplementary Figure S7. Planktonic bacterial growth curves for EC52, EC52ΔfecA, and**

115 **EC52ΔfecA::fecA strains.** By one-way ANOVA with Dunnett's multiple comparisons test.  $P \leq$

116 0.05 is considered statistically significant. ns: not significant. \*:  $P \leq 0.05$ . \*\*:  $P < 0.01$ . \*\*\*:  $P <$

117 0.001. \*\*\*\*:  $P < 0.0001$ .

118

119

120

121

122

123

124

125

126

127

128

129



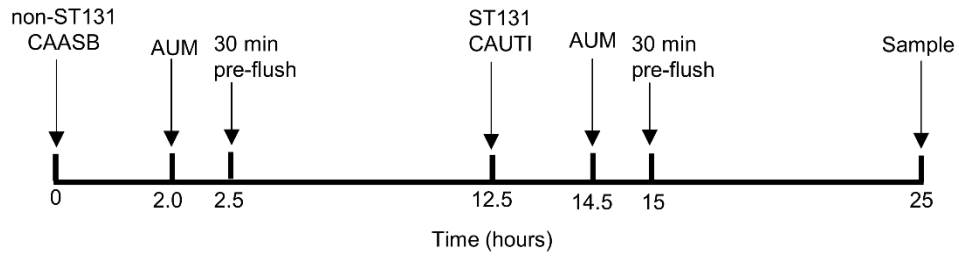

130

131 **Supplementary Figure S8.** Experimental timeline of bacterial interference test using

132 continuous flow catheter model.

133

134

135

136

137

138

139

140

141

142

143

144

145

146

147

148

149

150

151



156 bold, with SNPs labelled as “#”. **(a)** Gene *adk* (adenylate kinase) is identified with SNPs-  
157 containing regions that can differentiate EC24, EC25, and EC26 from 10 ST131 CAUTI isolates.  
158 Seq\_1 = EC24, EC25, and EC26. Seq\_2 = Ten ST131 CAUTI isolates. **(b)** Gene *adk* (adenylate  
159 kinase) is identified with SNPs-containing regions that can differentiate EC27 from 10 ST131  
160 CAUTI isolates. Seq\_1 = EC27. Seq\_2 = Ten ST131 CAUTI isolates. **(c)** Gene *gyrB* (DNA  
161 gyrase) is identified with SNPs-containing regions that can differentiate EC33, EC34, EC35, and  
162 EC36 from 10 ST131 CAUTI isolates. Seq\_1 = EC33, EC34, EC35, and EC36. Seq\_2 = Ten  
163 ST131 CAUTI isolates. **(d)** Gene *adk* (adenylate kinase) is identified with SNPs-containing  
164 regions that can differentiate EC37, EC38, and EC39 from 10 ST131 CAUTI isolates. Seq\_1 =  
165 EC37, EC38, and EC39. Seq\_2 = Ten ST131 CAUTI isolates.

166

167

168

169

170

171

172

173

174

175

176

177

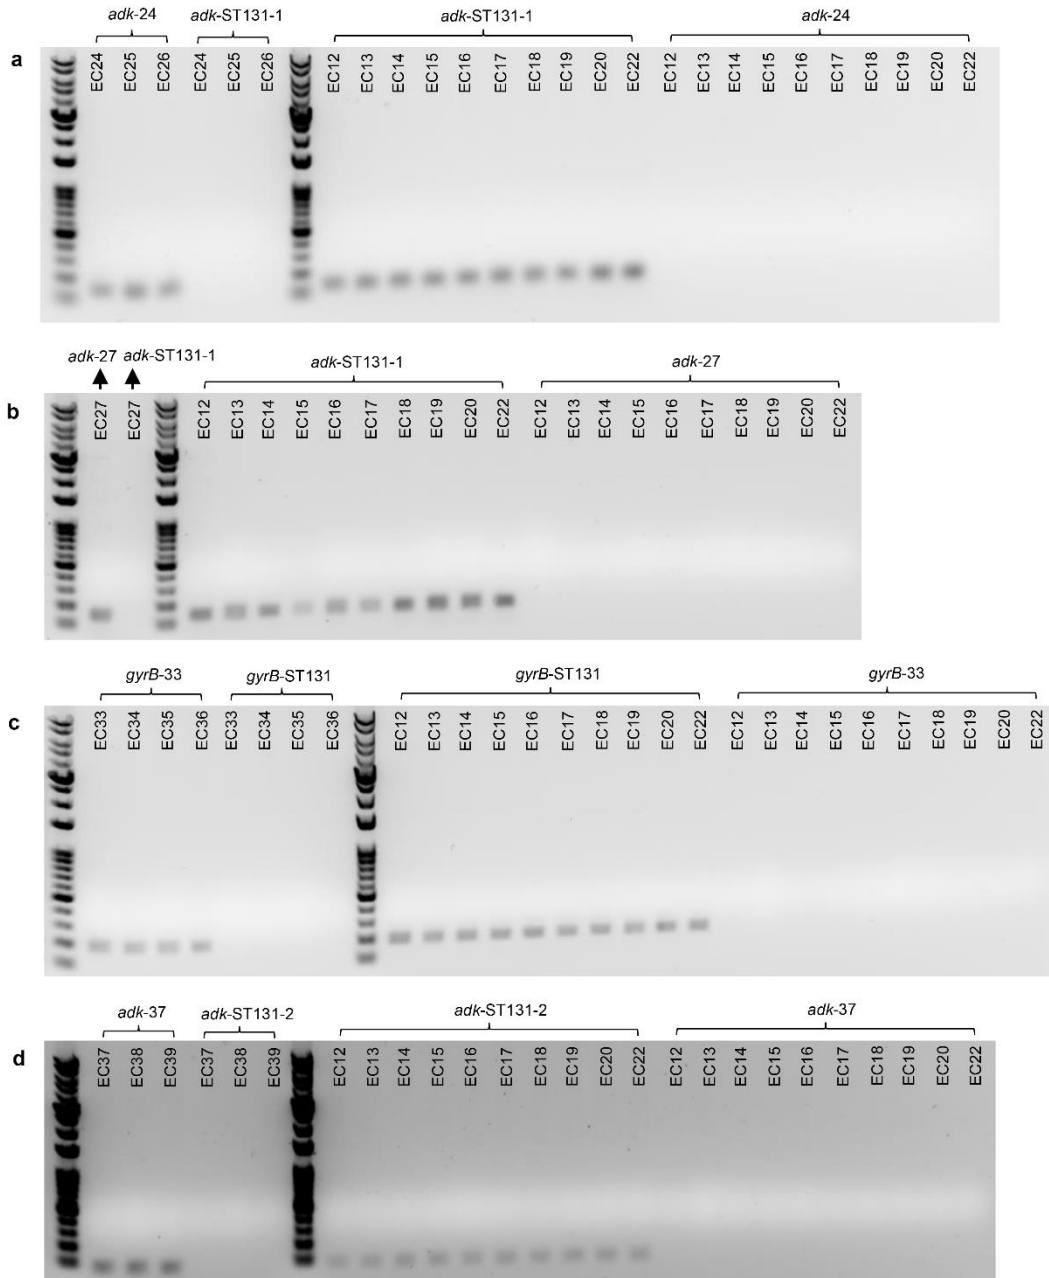

178

179 **Supplementary Figure S10. Polymerase chain reaction (PCR) and gel electrophoresis**  
 180 **validate that SNPs-based assays can distinguish two *E. coli* isolates in the mixed**  
 181 **cultures of competition tests. (a) Primers *adk-24* (forward & reverse) can only amplify specific**  
 182 **SNPs-containing *adk* sequences of EC24, EC25, and EC26, but not of 10 ST131 CAUTI**  
 183 **isolates. In contrast, primers *adk-ST131-1* (forward & reverse) can only amplify specific SNPs-**  
 184 **containing *adk* sequences of 10 ST131 CAUTI isolates, but not of EC24, EC25, and EC26.**

185 Therefore, the specific SNPs-containing *adk* sequences are able to distinguish EC24, EC25,  
186 and EC26 from the 10 ST131 CAUTI isolates. **(b)** Primers *adk*-27 (forward & reverse) can only  
187 amplify specific SNPs-containing *adk* sequences of EC27, but not of 10 ST131 CAUTI isolates.  
188 In contract, primers *adk*-ST131-1 (forward & reverse) can only amplify specific SNPs-containing  
189 *adk* sequences of 10 ST131 CAUTI isolates, but not of EC27. Therefore, the specific SNPs-  
190 containing *adk* sequences are able to distinguish EC27 from the 10 ST131 CAUTI isolates. **(c)**  
191 Primers *gyrB*-33 (forward & reverse) can only amplify specific SNPs-containing *gyrB* sequences  
192 of EC33, EC34, EC35, and EC36, but not of 10 ST131 CAUTI isolates. In contract, primers  
193 *gyrB*-ST131 (forward & reverse) can only amplify specific SNPs-containing *gyrB* sequences of  
194 10 ST131 CAUTI isolates, but not of EC33, EC34, EC35, and EC36. Therefore, the specific  
195 SNPs-containing *gyrB* sequences are able to distinguish EC33, EC34, EC35, and EC36 from  
196 the 10 ST131 CAUTI isolates. **(d)** Primers *adk*-37 (forward & reverse) can only amplify specific  
197 SNPs-containing *adk* sequences of EC37, EC38, and EC39, but not of 10 ST131 CAUTI  
198 isolates. In contract, primers *adk*-ST131-2 (forward & reverse) can only amplify specific SNPs-  
199 containing *adk* sequences of 10 ST131 CAUTI isolates, but not of EC37, EC38, and EC39.  
200 Therefore, the specific SNPs-containing *adk* sequences are able to distinguish EC37, EC38,  
201 and EC39 from the 10 ST131 CAUTI isolates.

202

203

204

205

206

207

208

209

210

211 **Supplementary tables**

212 **Supplementary Table S1.** Pan-genome gene counts for 41 clinical *E. coli* isolates

| <i>E. coli</i> isolate | Pan-genome size |
|------------------------|-----------------|
| EC12                   | 4763            |
| EC13                   | 4873            |
| EC14                   | 4754            |
| EC15                   | 4856            |
| EC16                   | 4789            |
| EC17                   | 4796            |
| EC18                   | 4701            |
| EC19                   | 4743            |
| EC20                   | 4658            |
| EC21                   | 4320            |
| EC22                   | 4578            |
| EC23                   | 4813            |
| EC24                   | 4787            |
| EC25                   | 4716            |
| EC26                   | 4460            |
| EC27                   | 4579            |
| EC28                   | 5088            |
| EC29                   | 5983            |
| EC30                   | 4745            |
| EC31                   | 4656            |
| EC32                   | 4866            |
| EC33                   | 4795            |
| EC34                   | 4776            |
| EC35                   | 4627            |
| EC36                   | 4856            |
| EC37                   | 4568            |
| EC38                   | 4829            |
| EC39                   | 4326            |
| EC40                   | 4612            |
| EC41                   | 4901            |
| EC42                   | 5078            |
| EC43                   | 4660            |
| EC44                   | 4749            |
| EC46                   | 4864            |
| EC47                   | 4618            |
| EC48                   | 4645            |
| EC49                   | 4662            |
| EC50                   | 4629            |
| EC51                   | 4879            |
| EC52                   | 4919            |

213

214

215

216

217

218

219

220

221

222

223

224

225

226

227

228

229

230

231

232

233

234

235

236

237

238 **Supplementary Table S2.** Pan-genome gene counts for 15 B2a sub-clade *E. coli* isolates

| B2a isolate | Pan-genome size |
|-------------|-----------------|
| EC12        | 4763            |
| EC13        | 4873            |
| EC14        | 4754            |
| EC15        | 4856            |
| EC16        | 4789            |
| EC17        | 4796            |
| EC18        | 4701            |
| EC19        | 4743            |
| EC20        | 4658            |
| EC22        | 4578            |
| EC28        | 5088            |
| EC29        | 5983            |
| EC30        | 4745            |
| EC31        | 4656            |
| EC32        | 4866            |

239

240

241

242

243

244

245

246

247

248

249

250

251

252

253

254



255 **Supplementary Table S3.** Carriage of antibiotic resistance genes in phylotype B2 *E. coli*  
 256 strains.

| Antibiotic      | Antibiotic resistance gene                                                                                   | B2 subclade |          | Two-tailed Fisher's exact test ( <i>P</i> ) <sup>a</sup> |
|-----------------|--------------------------------------------------------------------------------------------------------------|-------------|----------|----------------------------------------------------------|
|                 |                                                                                                              | B2a (15)    | B2b (13) |                                                          |
| Aminoglycoside  | <i>aac(3)-IId, aac(6')-Ib-cr, aac(6')-Ib3, aadA1, aadA2, aadA5, aph(3'')-Ib, aph(3')-Ia, aph(6)-Id, strA</i> | 11 (73%)    | 2 (15%)  | 0.0032                                                   |
| Beta-lactam     | <i>blaCMY-2, blaCMY-7, blaLEN16, blaOXA-1, blaTEM-1B, blaTEM-1C, ampC</i>                                    | 15 (100%)   | 6 (46%)  | 0.0014                                                   |
| Amphenicol      | <i>catA1, catA2, catB4, cmlA1</i>                                                                            | 3 (20%)     | 0 (0%)   | 0.2262                                                   |
| TMP/SMX         | <i>dfrA1, dfrA12, dfrA15, dfrA17, dfrA19, dfrA5, dfrB4, sul1, sul2, sul3</i>                                 | 9 (60%)     | 2 (15%)  | 0.0238                                                   |
| MLS             | <i>erm(B), mdf(A), mph(A)</i>                                                                                | 15 (100%)   | 12 (92%) | 0.4643                                                   |
| Fluoroquinolone | <i>oqxA, oqxB, qepA1, gyrA, parC, parE</i>                                                                   | 15 (100%)   | 3 (23%)  | 0.0001                                                   |
| Tetracycline    | <i>tet(A), tet(B), tet(D), tet(M)</i>                                                                        | 7 (47%)     | 2 (15%)  | 0.1145                                                   |

257 <sup>a</sup> *P* ≤ 0.05 is considered statistically significant.

258

259

260

261

262

263

264

265

266

267

268

269

270

271

272

273 **Supplementary Table S4.** Seventy-two biofilm-associated genes.

| Biofilm level     | Biofilm-associated genes                                                                                                                                                                                                                                                                                                                                                                                                          |
|-------------------|-----------------------------------------------------------------------------------------------------------------------------------------------------------------------------------------------------------------------------------------------------------------------------------------------------------------------------------------------------------------------------------------------------------------------------------|
| High-biofilm (46) | <i>fecA, fecB, fecC, fecD, fecE, fecI, fecR, iucA, iucB, iucC, iucD, iutA, group_2401, group_1339, ltrA, fucP, group_5022, group_6794, group_1842, ssuA, group_2483, group_2486, iraM, group_2393, group_6792, group_6793, group_6910, rbsK, group_1398, group_163, group_3360, group_523, group_6919, group_990, adrB, cirA, group_21, group_6911, group_5101, ccdB, group_1036, group_2994, ylpA, flu, group_193, group_246</i> |
| Low-biofilm (26)  | <i>group_7558, group_1149, group_1713, group_228, group_312, tfaE, ascG, bglH, group_2755, tufB, gnu, group_3170, mbtM, group_1780, hicB, rhsB, tap, yedR, group_1225, group_1438, group_2524, group_3689, group_405, group_5064, group_5299, group_7629</i>                                                                                                                                                                      |

274

275

276

277

278

279

280

281

282

283

284

285

286

287

288

289

290

291

292

293 **Supplementary Table S5.** Recipe of the artificial urine medium (AUM)

| Component                           | Quantify (g) | Concentration (mmol/L) |
|-------------------------------------|--------------|------------------------|
| Oxoid Peptone L37                   | 1            | /                      |
| Yeast extract                       | 0.005        | /                      |
| Lactic acid                         | 0.1          | 1.1                    |
| Citric acid                         | 0.4          | 2                      |
| Sodium bicarbonate                  | 2.1          | 25                     |
| Urea                                | 10           | 170                    |
| Uric acid                           | 0.07         | 0.4                    |
| Creatinine                          | 0.8          | 7                      |
| Calcium chloride.2H <sub>2</sub> O  | 0.37         | 2.5                    |
| Sodium chloride                     | 5.2          | 90                     |
| Zinc sulfate.7 H <sub>2</sub> O     | 0.00209      | 0.007                  |
| Magnesium sulfate.7H <sub>2</sub> O | 0.49         | 2                      |
| Sodium sulfate.10H <sub>2</sub> O   | 3.2          | 10                     |
| Potassium dihydrogen phosphate      | 0.95         | 7                      |
| Di-potassium hydrogen phosphate     | 1.2          | 7                      |
| Ammonium chloride                   | 1.3          | 25                     |
| Distilled water                     | To 1 Liter   |                        |

294

295

296

297

298

299

300

301

302

303

304

305

306

307

308

309

310 **Supplementary Table S6.** Eleven non-ST131 CAASB and Ten ST131 CAUTI *E. coli* isolates  
 311 selected for bacterial interference tests.

| Group                      | Strain | Phylotype | Sequence type (ST) |
|----------------------------|--------|-----------|--------------------|
| ST131 CAUTI<br>(10)        | EC12   | B2        | 131                |
|                            | EC13   | B2        | 131                |
|                            | EC14   | B2        | 131                |
|                            | EC15   | B2        | 131                |
|                            | EC16   | B2        | 131                |
|                            | EC17   | B2        | 131                |
|                            | EC18   | B2        | 131                |
|                            | EC19   | B2        | 131                |
|                            | EC20   | B2        | 131                |
|                            | EC22   | B2        | 131                |
| Non-ST131<br>CAASB<br>(11) | EC24   | B1        | 10                 |
|                            | EC25   | B1        | 167                |
|                            | EC26   | B1        | 744                |
|                            | EC27   | B1        | Untypeable         |
|                            | EC33   | B2        | 144                |
|                            | EC34   | B2        | 95                 |
|                            | EC35   | B2        | 12                 |
|                            | EC36   | B2        | 12                 |
|                            | EC37   | D         | 354                |
|                            | EC38   | D         | 68                 |
|                            | EC39   | D         | 1884               |

312

313

314

315

316

317

318

319

320

321

322

323

324

325 **Supplementary Table S7.** SNPs-qPCR standard curves for differentially quantifying non-ST131  
 326 CAASB and ST131 CAUTI *E. coli* DNAs in mixed bacteria cultures from bacterial interference  
 327 tests.

| $\log(Cq) = A\log(DNA) + B^a$ |                         |                          |                         |                         |                         |                         |                |                         |                         |                         |
|-------------------------------|-------------------------|--------------------------|-------------------------|-------------------------|-------------------------|-------------------------|----------------|-------------------------|-------------------------|-------------------------|
| <i>adk</i> <sup>b</sup>       |                         | <i>gyrB</i> <sup>c</sup> |                         | <i>adk</i> <sup>d</sup> |                         |                         |                |                         |                         |                         |
| Non-ST131<br>CAASB            | EC24                    | $y = -0.0841x + 1.2150$  | Non-ST131<br>CAASB      | EC33                    | $y = -0.0775x + 1.1971$ | Non-ST131<br>CAASB      | EC37           | $y = -0.0808x + 1.2399$ |                         |                         |
|                               | EC25                    | $y = -0.0796x + 1.2055$  |                         | EC34                    | $y = -0.0751x + 1.2819$ |                         | EC38           | $y = -0.0746x + 1.2921$ |                         |                         |
|                               | EC26                    | $y = -0.0837x + 1.2036$  |                         | EC35                    | $y = -0.0904x + 1.1820$ |                         | EC39           | $y = -0.0738x + 1.2464$ |                         |                         |
|                               | EC27                    | $y = -0.0872x + 1.1886$  |                         | EC36                    | $y = -0.0824x + 1.1836$ |                         | EC12           | $y = -0.0751x + 1.2525$ |                         |                         |
|                               | EC12                    | $y = -0.0803x + 1.2313$  |                         | EC12                    | $y = -0.0859x + 1.2264$ |                         | EC13           | $y = -0.0765x + 1.2707$ |                         |                         |
|                               | EC13                    | $y = -0.0776x + 1.2508$  |                         | EC13                    | $y = -0.0795x + 1.2450$ |                         | EC14           | $y = -0.0792x + 1.2323$ |                         |                         |
|                               | EC14                    | $y = -0.0773x + 1.2168$  |                         | EC14                    | $y = -0.0836x + 1.2132$ |                         | EC15           | $y = -0.0793x + 1.2225$ |                         |                         |
|                               | EC15                    | $y = -0.0777x + 1.2006$  |                         | EC15                    | $y = -0.0759x + 1.2005$ |                         | ST131<br>CAUTI | EC16                    | $y = -0.0805x + 1.2153$ |                         |
|                               | ST131<br>CAUTI          | EC16                     |                         | $y = -0.0817x + 1.2068$ | EC16                    |                         |                | $y = -0.0706x + 1.2179$ | EC17                    | $y = -0.0747x + 1.2535$ |
|                               |                         | EC17                     |                         | $y = -0.0800x + 1.2331$ | EC17                    |                         |                | $y = -0.0831x + 1.2230$ | EC18                    | $y = -0.0688x + 1.2639$ |
| EC18                          |                         | $y = -0.0749x + 1.2186$  | EC18                    | $y = -0.0751x + 1.2201$ | EC19                    | $y = -0.0724x + 1.2664$ |                |                         |                         |                         |
| EC19                          |                         | $y = -0.0800x + 1.2442$  | EC19                    | $y = -0.0785x + 1.2393$ | EC20                    | $y = -0.0810x + 1.1940$ |                |                         |                         |                         |
| EC20                          |                         | $y = -0.0914x + 1.1798$  | EC20                    | $y = -0.0838x + 1.1845$ | EC22                    | $y = -0.0681x + 1.2778$ |                |                         |                         |                         |
| EC22                          | $y = -0.0747x + 1.2551$ | EC22                     | $y = -0.0812x + 1.2494$ |                         |                         |                         |                |                         |                         |                         |

328 <sup>a</sup> Standard curve for quantifying *E. coli* DNAs in mixed bacterial culture from bacterial  
 329 interference tests. *Cq*: threshold cycles in qPCR. DNA: concentration of DNA, ng/μL.

330 <sup>b</sup> SNPs identified in one portion of gene *adk* (adenylate kinase) are able to differentiate non-  
 331 ST131 CAASB strains, EC24, EC25, EC26, and EC27, from ten ST131 CAUTI strains.

332 <sup>c</sup> SNPs identified in one portion of gene *gyrB* (DNA gyrase) are able to differentiate non-ST131  
 333 CAASB strains, EC33, EC34, EC35, and EC36, from ten ST131 CAUTI strains.

334 <sup>d</sup> SNPs identified in another portion of gene *adk* (adenylate kinase) are able to differentiate non-  
 335 ST131 CAASB strains, EC37, EC38, EC39, and EC27, from ten ST131 CAUTI strains.

336

337

338

339

340 **Supplementary Table S8.** Primers used in this study

| Primer Number | Name               | Sequence (5'-3')                                                                      | Description                                                                      |
|---------------|--------------------|---------------------------------------------------------------------------------------|----------------------------------------------------------------------------------|
| ZZ#12         | pGK73-Conf FP      | TGAACACCATAACCGAAAGTAGT                                                               | pGK73 plasmid confirmation forward primer                                        |
| ZZ#13         | pGK73-Conf RP      | ACCTTGAAGCGCATGAACT                                                                   | pGK73 plasmid confirmation reverse primer                                        |
| ZZ#14         | fecl-pGK73-Cons FP | GATCGAGCTCCATCTGATGGAAATGGAAGCCA<br>C                                                 | fecl-pGK73 plasmid construct forward primer                                      |
| ZZ#15         | fecl-pGK73-Cons RP | GATCGGATCCCATGCGGAGTGCATCAAAAGTT<br>A                                                 | fecl-pGK73 plasmid construct reverse primer                                      |
| ZZ#16         | fecl-pGK73-Conf FP | TGAACACCATAACCGAAAGTAGT                                                               | fecl-pGK73 plasmid confirmation forward primer                                   |
| ZZ#17         | fecl-pGK73-Conf RP | TTATTGACATCCTCACTGCC                                                                  | fecl-pGK73 plasmid confirmation reverse primer                                   |
| ZZ#18         | fecA-KO FP         | TTCTCGTTCGACTCATAGCTGAACACAACAAA<br>AATGATGATGGGAAAGTATTGTGTAGGCTG<br>GAGCTGC         | Red recombinase EC52 fecA knock out forward primer                               |
| ZZ#19         | fecA-KO RP         | CAACATAATCACATTCCAGCTAAAAGCCCGGC<br>AAGCCGGGCGTTAACACAGGTCCATATGAATA<br>TCCTCCTTAGTTC | Red recombinase EC52 fecA knock out reverse primer                               |
| ZZ#20         | fecA-Conf FP       | GCGGTAAGGATAAACATTTTAC                                                                | EC52 fecA knock out confirmation forward primer                                  |
| ZZ#21         | fecA-Conf RP       | CAGGCCTGCAAAAAGAAAAC                                                                  | EC52 fecA knock out confirmation reverse primer                                  |
| ZZ#22         | fecA-pKT25-Cons FP | GACTAAGCTTGGAAAATAATTCTTATTTCGATT<br>G                                                | fecA-pKT25 plasmid construct forward primer                                      |
| ZZ#23         | fecA-pKT25-Cons RP | GACTGAATTCTCAGAATTCAACGACCCCTGC                                                       | fecA-pKT25 plasmid construct reverse primer                                      |
| ZZ#24         | fecA-pKT25-Conf FP | ATCACATATTCTGCTGACGCA                                                                 | fecA-pKT25 plasmid confirmation forward primer                                   |
| ZZ#25         | fecA-pKT25-Conf RP | GTTTTACCTGCAGTCCGCTG                                                                  | fecA-pKT25 plasmid confirmation reverse primer                                   |
| ZZ#26         | adk-24 FP          | GATCGTTGACCGTATCGTC                                                                   | qPCR of adk SNPs-containing region in EC24, EC25, and EC26 forward primer        |
| ZZ#27         | adk-24 RP          | GTACGGTCTCTTCTGATCA                                                                   | qPCR of adk SNPs-containing region in EC24, EC25, and EC26 reverse primer        |
| ZZ#28         | adk-27 FP          | TGTTGATCGTATCGTCGGT                                                                   | qPCR of adk SNPs-containing region in EC27 forward primer                        |
| ZZ#29         | adk-27 RP          | AGACGTTTACGCACGGTT                                                                    | qPCR of adk SNPs-containing region in EC27 reverse primer                        |
| ZZ#30         | adk-ST131-1 FP     | TTGTTGACCGTATCGTAGGC                                                                  | qPCR of adk SNPs-containing region-1 in ST131-CAUTI isolates forward primer      |
| ZZ#31         | adk-ST131-1 RP     | TACGGTCTCTTCTGATCGT                                                                   | qPCR of adk SNPs-containing region-1 in ST131-CAUTI isolates reverse primer      |
| ZZ#32         | gyrB-33 FP         | TGACCGAGTTCGAATATGAC                                                                  | qPCR of gyrB SNPs-containing region in EC33, EC34, EC35, and EC36 forward primer |
| ZZ#33         | gyrB-33 RP         | CGTCTTTTTCGGTGGAG                                                                     | qPCR of gyrB SNPs-containing region in EC33, EC34, EC35, and EC36 reverse primer |
| ZZ#34         | gyrB-ST131 FP      | TGACCGAGTTCGAATATGAA                                                                  | qPCR of gyrB SNPs-containing region in ST131-CAUTI isolates forward primer       |
| ZZ#35         | gyrB-ST131 RP      | CGTCTTTTTCGGTGGAA                                                                     | qPCR of gyrB SNPs-containing region in ST131-CAUTI isolates reverse primer       |
| ZZ#36         | adk-37 FP          | CTCAGGAAGACTGCCGTAAT                                                                  | qPCR of adk SNPs-containing region in EC37, EC38, and EC39 forward primer        |
| ZZ#37         | adk-37 RP          | ATGCCCGCTTCTTTCATC                                                                    | qPCR of adk SNPs-containing region in EC37, EC38, and EC39 reverse primer        |
| ZZ#38         | adk-ST131-2 FP     | AGGAAGACTGCCGCAAC                                                                     | qPCR of adk SNPs-containing region-2 in ST131-CAUTI isolates forward primer      |
| ZZ#39         | adk-ST131-2 RP     | ATGCCCGCTTCTTTCATT                                                                    | qPCR of adk SNPs-containing region-2 in ST131-CAUTI isolates reverse primer      |

341

342

343

344

345

346

347 **Supplementary Table S9.** Strains derived for this study to assess *fec* expression and *fec*  
 348 mutant biofilm formation.

| Strain                           | Relevant antibiotic resistance <sup>a</sup> | Characteristic                                                                                | Reference  |
|----------------------------------|---------------------------------------------|-----------------------------------------------------------------------------------------------|------------|
| EC52                             |                                             | Wild type <i>E. coli</i> rectal colonization isolate, high-biofilm former                     | [1, 2]     |
| EC52::RFP                        | Amp <sup>R</sup>                            | EC52 ectopically expressing RFP from pGK73 plasmid                                            | This study |
| EC52:: <i>fecI</i> -RFP          | Amp <sup>R</sup>                            | EC52 ectopically expressing RFP from <i>fecI</i> -pGK73 plasmid                               | This study |
| EC52Δ <i>fecA</i>                |                                             | EC52 with an in-frame deletion of <i>fecA</i> , ferric citrate transport deficient            | This study |
| EC52Δ <i>fecA</i> :: <i>fecA</i> | Kan <sup>R</sup>                            | EC52Δ <i>fecA</i> with an ectopic <i>fecA</i> complementation from <i>fecA</i> -pKT25 plasmid | This study |

349 <sup>a</sup> Amp<sup>R</sup>, resistance to ampicillin antibiotic. Kan<sup>R</sup>, resistance to kanamycin antibiotic.

350

351

352

353

354

355

356

357

358

359

360

361

362

363

364

365

366

367

368

369 **References**

- 370 1. Marschall J, Zhang L, Foxman B, Warren DK, Henderson JP, Program CDCPE. Both  
371 host and pathogen factors predispose to Escherichia coli urinary-source bacteremia in  
372 hospitalized patients. Clin Infect Dis. 2012;54(12):1692-8. Epub 2012/03/21. doi:  
373 10.1093/cid/cis252. PubMed PMID: 22431806; PubMed Central PMCID: PMC3357479.
- 374 2. Jonas Marschall MLP, Betsy Foxman, Lixin Zhang, David K Warrenj, Jeffrey P  
375 Henderson. Patient characteristics but not virulence factors discriminate between asymptomatic  
376 and symptomatic. BMC Infectious Diseases. 2013;13(213).
